# Supplementary material
Source: MDPI journal article supplement (https://www.mdpi.com/2072-4292/12/11/1765)
Supplement: s1 [file s1]

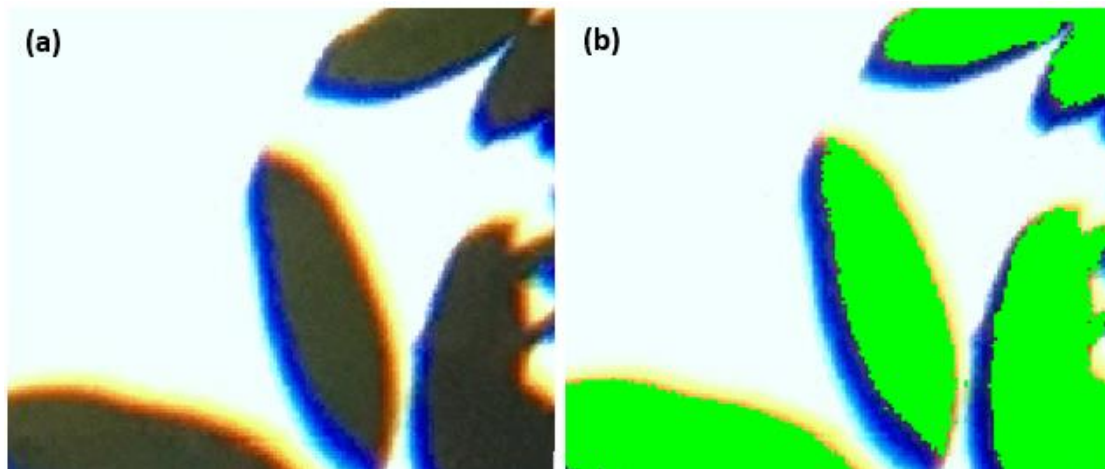

**Figure S1.** Example classification scheme in CAN-EYE from the STR150 trail location image. (a) True color image and (b) classified image where green pixels denote the vegetation class and non-green pixels denote the sky class.
