# Supplementary material
Source: MDPI journal article supplement (https://www.mdpi.com/2072-4292/12/11/1765)
Supplement: s1 [file s1]

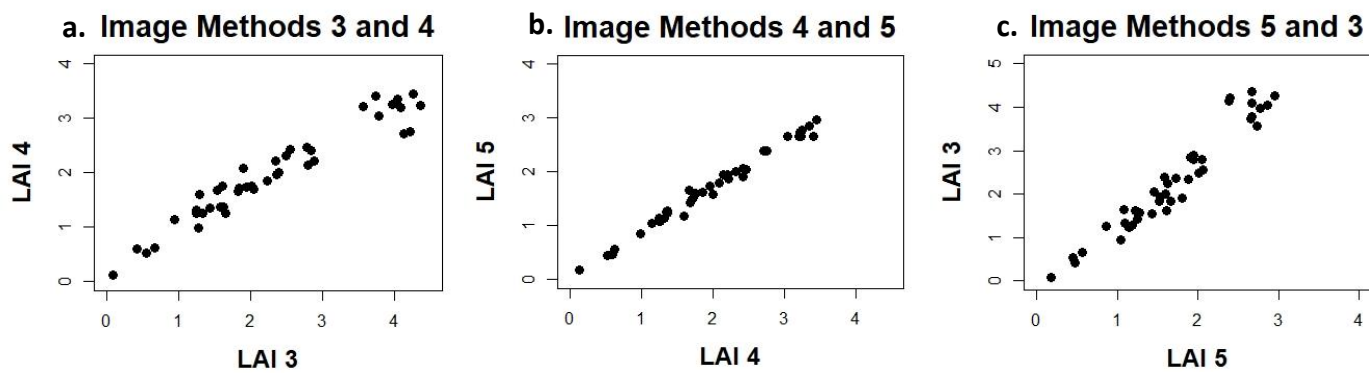

**Figure S2.** Image method correlations between CAN-EYE  $PAI_{eff}$  values derived from smartphone fisheye images for (a) image methods 3 and 4, (b) image methods 4 and 5, and (c) image methods 5 and 3.
